# Supplementary material for: Facile synthesis and high d33 of single-crystalline KNbO3 nanocubes
Source: Royal Society of Chemistry journal article supplement (doi:10.1039/b810342a), 2008-01-01
Supplement: b810342a.pdf [file b810342a.pdf]

## Supplementary information (Ref: B810342A)

### Figure Captions:

- S 1. Infrared spectra of the as-prepared samples  $\text{KNbO}_3$  particle
- S 2. Raman spectra of the as-prepared samples  $\text{KNbO}_3$  particle
- S 3. Scanning electron microscope (SEM) micrographs of the starting material  $\text{Nb}_2\text{O}_5$
- S 4. Frequency dependence of impedance,  $Z$ , on the (p)-mode for KN ceramics derived from single-crystalline cubes
- S 5. Temperature dependence of dielectric constant  $\epsilon_r$  and loss  $\tan\delta$  at various frequencies for  $\text{KNbO}_3$  ceramics derived from single-crystalline cubes

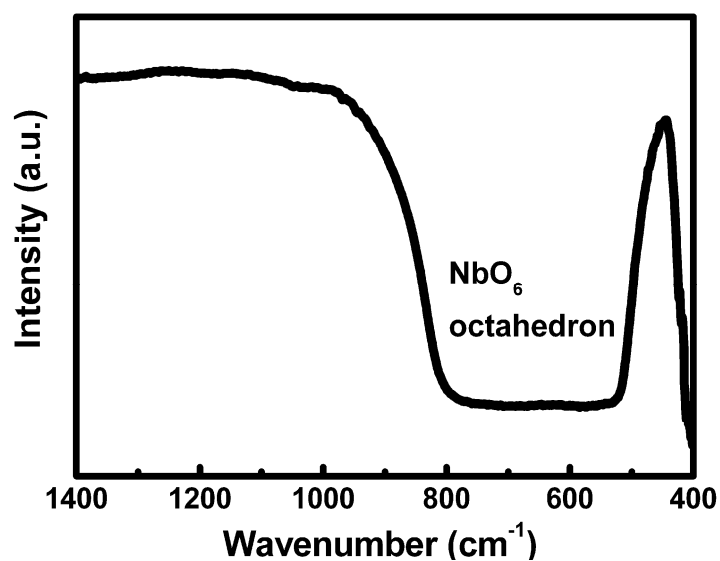

S 1. Infrared spectra of the as-prepared samples KNbO<sub>3</sub> particle

(By Haiyan Ge, et al.)

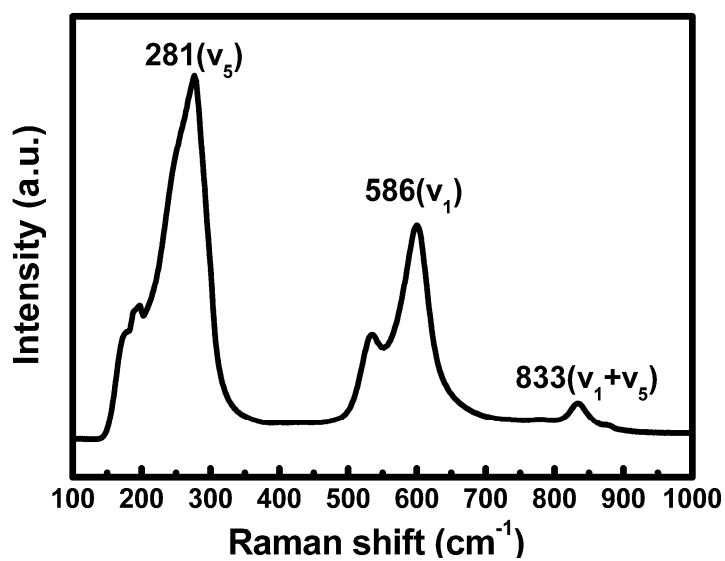

S 2. Raman spectra of the as-prepared samples KNbO<sub>3</sub> particle

(By Haiyan Ge, et al.)

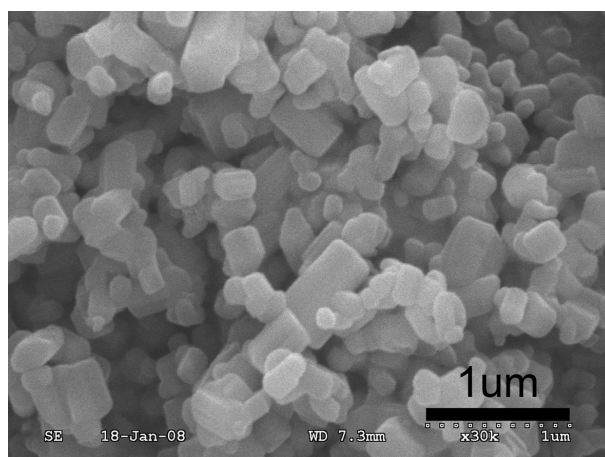

S 3. Scanning electron microscope (SEM) micrographs of the starting material  $\text{Nb}_2\text{O}_5$

(By Haiyan Ge, *et al.*)

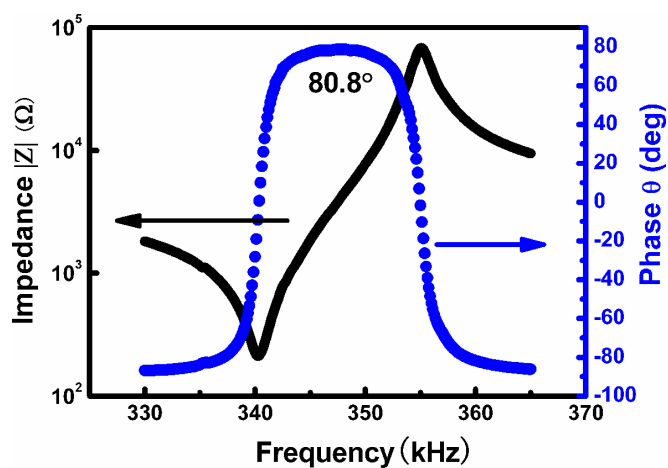

S 4. Frequency dependence of impedance,  $Z$ , on the (p)-mode for KN ceramics

derived from single-crystalline cubes

(By Haiyan Ge, *et al.*)

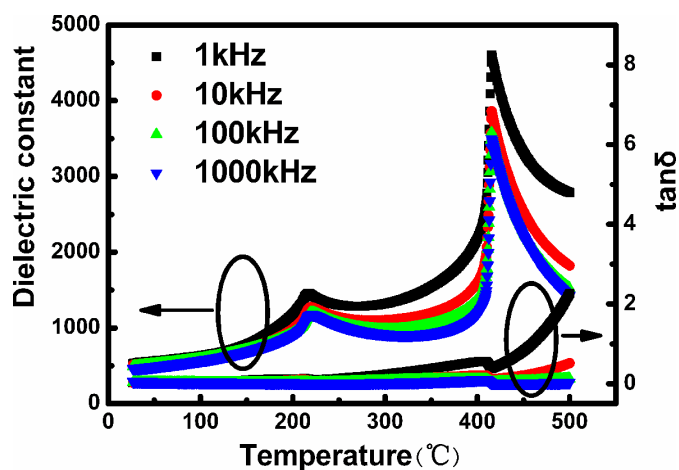

S 5. Temperature dependence of dielectric constant  $\epsilon_r$  and loss  $\tan\delta$  at various frequencies for  $\text{KNbO}_3$  ceramics derived from single-crystalline cubes

(By Haiyan Ge, *et al.*)
